# Supplementary material for: Humans as inverted bats: A comparative approach to the obstetric conundrum
Source: PubMed Central journal article supplement (PMC6492174; doi:10.1002/ajhb.23227), 2019-02-27
Supplement: AJHB-31-na-s003.pdf [file AJHB-31-na-s003.pdf]

Table S2

|                    |                  | Fig. 3                       | Fig. 4             | Fig. 5                           | Fig. 6                                                |
|--------------------|------------------|------------------------------|--------------------|----------------------------------|-------------------------------------------------------|
|                    |                  | Data from Boddy et al. 2012b | Data from Table S1 | Data from Capellini et al. 2010b | Matching species b/w Boddy et al. & Cappellini et al. |
| Higher-order taxon |                  | <i>species (N)</i>           | <i>species (N)</i> | <i>species (N)</i>               | <i>species (N)</i>                                    |
| MONOTREMATA        | Monotremata      | 3                            | 0                  | 0                                | 0                                                     |
| PLACENTALIA        | Afrosoricida     | 12                           | 0                  | 1                                | 1                                                     |
|                    | Carnivora        | 60                           | 52                 | 15                               | 9                                                     |
|                    | Cetartiodactyla  | 35                           | 45                 | 27                               | 8                                                     |
|                    | Chiroptera       | 42                           | 25                 | 1                                | 0                                                     |
|                    | Eulipotyphla     | 33                           | 9                  | 2                                | 2                                                     |
|                    | Hyracoidea       | 1                            | 1                  | 1                                | 1                                                     |
|                    | Lagomorpha       | 15                           | 4                  | 2                                | 2                                                     |
|                    | Macroscelidea    | 3                            | 0                  | 2                                | 0                                                     |
|                    | Perissodactyla   | 3                            | 4                  | 3                                | 1                                                     |
|                    | Pholidota        | 0                            | 2                  | 0                                | 0                                                     |
|                    | Primates         | 76                           | 44                 | 33                               | 22                                                    |
|                    | Proboscidea      | 2                            | 2                  | 2                                | 1                                                     |
|                    | Rodentia         | 258                          | 93                 | 18                               | 10                                                    |
|                    | Scandentia       | 3                            | 0                  | 1                                | 1                                                     |
|                    | Sirenia          | 1                            | 1                  | 0                                | 0                                                     |
|                    | Xenarthra        | 9                            | 2                  | 1                                | 1                                                     |
| MARSUPIALIA        | Dasyuromorphia   | 18                           | 0                  | 0                                | 0                                                     |
|                    | Didelphimorphia  | 13                           | 0                  | 0                                | 0                                                     |
|                    | Diprotodontia    | 33                           | 0                  | 0                                | 0                                                     |
|                    | Paucituberculata | 1                            | 0                  | 0                                | 0                                                     |
|                    | Peramelemorphia  | 9                            | 0                  | 0                                | 0                                                     |
|                    | <b>Total</b>     | <b>630</b>                   | <b>284</b>         | <b>109</b>                       | <b>59</b>                                             |
